# Supplementary material for: Melkersson–Rosenthal Syndrome in Childhood: Report of Three Paediatric Cases and a Review of the Literature
Source: MDPI journal article supplement (doi:10.3390/ijerph16071289), 2019-04-10
Supplement: s1 [file s1]

| Laboratory analysis         | Instrumental analysis               |
|-----------------------------|-------------------------------------|
| complete haemogram          | otoscopy                            |
| serum electrolytes          | audiometry                          |
| C-reactive protein          | electrocardiography                 |
| glucose                     | Cerebrospinal Fluid (CSF) analysis* |
| creatine phosphokinase      | brain Computed Tomography (CT)**    |
| kidney indices              |                                     |
| liver function tests        |                                     |
| bilirubin                   |                                     |
| thyroid function tests      |                                     |
| complete autoimmunity panel |                                     |

Supplementary Materials Table 1 – List of exams that were performed in all three cases reported in the article. \*CSF analysis was performed in Patient #1 and Patient #3. \*\*Brain Computed Tomography was performed in Patient #1 and Patient #2.
